# Supplementary material
Source: ML conference proceedings conference paper supplement (https://openreview.net/forum?id=dwIeEhbaD0)
Supplement: supplementary_material [file attachment]

## A Societal Impacts

Machine learning models have become increasingly pervasive in society, from medicine [10, 67, 15] and law [38] to entertainment [14, 9, 80]. Therefore, it is important that users of the technology understand the factors underlying model predictions. To this end we propose SmoothHess for quantifying the feature interactions affecting model output. Potential applications of our method are widespread; SmoothHess may be used to find interactions influencing a model to predict whether a customer will default on a credit loan or if a patient has melanoma. The deeper understanding of the model gleaned from SmoothHess may be used to improve decision making. For instance, a doctor may notice that the SmoothHess feature interactions between the pixels in an image of a lesion don't "make sense", indicating that the model should not be trusted and that a more granular human assessment is required. However, such applications are highly sensitive and the cost of inaccurate predictions, or, in this case, misinterpreted attributions, can be high. An inaccurate interpretation can instill unwarranted trust, or mistrust, in a user. In the most extreme cases this may lead to sub-optimal decision making such as the confident denial of a credit loan to a trustworthy customer or misdiagnosis of a benign lesion as malignant.

In addition, it is important to note the challenges related to ensuring robust, stable, and trustworthy explanations. In particular, recent works have uncovered issues related to the sensitivity of the explainer to small changes in the input [5, 41], adversarial attacks [27, 20, 37], or hyperparameter tuning [8]. Methods have been proposed that attempt to quantify explanation uncertainty [75, 69, 35], however further challenges remain. Thus, as with all methods for explaining machine learning model predictions, we recommend that SmoothHess is used in tandem with the careful consideration of domain experts, who are best equipped to interpret interactions in the context of their field.

## B Proof of Proposition 1

### B.1 Preliminary

We make use of a Lemma from Lin et al. [49] in our proof below, which we relate here:

**Lemma 3.** (Lin et al. [49]) Denote  $x_0 \in \mathbb{R}^d$ , locally-Lipschitz continuous function  $h(z) : \mathbb{R}^d \rightarrow \mathbb{R}$ , covariance matrix  $\Sigma \in \mathbb{R}^{d \times d}$ , random vector  $z \in \mathbb{R}^d$  distributed from  $z \sim \mathcal{N}(x_0, \Sigma)$ . If  $\mathbb{E}_z[|h(z)|] < \infty$ , then

$$\mathbb{E}_z[\Sigma^{-1}((z - x_0)(z - x_0)^T - \Sigma)\Sigma^{-1}h(z)] = \mathbb{E}_z[\Sigma^{-1}(z - x_0)[\nabla_z h(z)]^T] \quad (13)$$

### B.2 Main Result

**Proposition 1.** Given  $x_0 \in \mathbb{R}^d$ ,  $L$ -Lipschitz continuous function  $g : \mathbb{R}^d \rightarrow \mathbb{R}$ , covariance matrix  $\Sigma \in \mathbb{R}^{d \times d}$  and random vector  $\delta \in \mathbb{R}^d$  distributed from  $\delta \sim \mathcal{N}(0, \Sigma)$  with density function  $q_\Sigma : \mathbb{R}^d \rightarrow \mathbb{R}$ , then

$$\mathbb{E}_\delta[\Sigma^{-1}\delta[\nabla_x g(x_0 + \delta)]^T] = \nabla_x^2[(g * q_\Sigma)(x_0)] = \nabla_x^2 h_{g, \Sigma}(x_0), \quad (7)$$

where  $*$  denotes convolution.

*Proof.* We define random vector  $z = x_0 + \delta \in \mathbb{R}^d$  distributed from  $z \sim \mathcal{N}(x_0, \Sigma)$ , and for which we denote the density function as  $p_\Sigma$ . We begin by showing  $\mathbb{E}_z[|g(z)|] = \mathbb{E}_\delta[|g(x_0 + \delta)|] < \infty$ . We are given that  $g$  is  $L$ -Lipschitz, i.e.  $\forall a, b \in \mathbb{R}^d$

$$|g(a) - g(b)| \leq L\|a - b\|_2 \quad (14)$$

for some  $L > 0$ .

Now, for any fixed  $\delta \in \mathbb{R}^d$  we have

$$|g(x_0 + \delta)| = |g(x_0) + (g(x_0 + \delta) - g(x_0))| \stackrel{\Delta \text{ ineq.}}{\leq} |g(x_0)| + |g(x_0 + \delta) - g(x_0)| \stackrel{\text{Eq. 14}}{\leq} \quad (15a)$$

$$|g(x_0)| + L\|x_0 + \delta - x_0\|_2 = |g(x_0)| + L\|\delta\|_2. \quad (15b)$$

Thus, we may bound the expectation  $\mathbb{E}_\delta[|g(x_0 + \delta)|]$ :

$$\mathbb{E}_\delta[|g(x_0 + \delta)|] \leq \mathbb{E}_\delta[|g(x_0)| + L\|\delta\|_2] = |g(x_0)| + L\mathbb{E}_\delta[\|\delta\|_2] < \infty. \quad (16)$$

Here  $g(x_0) < \infty$  as it is a constant, and it may be seen that  $L\mathbb{E}_\delta[\|\delta\|_2] < \infty$  using a simple change of variables. Defining  $\beta = \Sigma^{-\frac{1}{2}}\delta \sim \mathcal{N}(0, I)$  one may write  $\mathbb{E}_\delta[\|\delta\|_2] = \mathbb{E}_\beta[\|\Sigma^{\frac{1}{2}}\beta\|_2]$ . As a straightforward consequence of Cauchy-Schwarz, for any fixed  $\beta$ , one may write

$$\|\Sigma^{\frac{1}{2}}\beta\|_2 \leq \|\Sigma^{\frac{1}{2}}\|_F \|\beta\|_2 \quad (17)$$

where  $\|\cdot\|_F$  denotes the Frobenius norm. Noting that  $\|\beta\|_2 \sim \mathcal{X}_d$  we use Eq. (17) to see

$$\mathbb{E}_\beta[\|\Sigma^{\frac{1}{2}}\beta\|_2] \leq \mathbb{E}_\beta[\|\Sigma^{\frac{1}{2}}\|_F \|\beta\|_2] = \|\Sigma^{\frac{1}{2}}\|_F \mathbb{E}_\beta[\|\beta\|_2] = \|\Sigma^{\frac{1}{2}}\|_F \sqrt{2} \frac{\Gamma((d+1)/2)}{\Gamma(d/2)} < \infty \quad (18)$$

where  $\Gamma(\cdot)$  denotes the Gamma function.

Next, we move the Hessian operator inside the integral.

$$\nabla_x^2(g * q_\Sigma)(x_0) = \nabla_x^2 \int_{z \in \mathbb{R}^d} g(z) q_\Sigma(z - x_0) dz = \int_{z \in \mathbb{R}^d} g(z) \nabla_x^2 q_\Sigma(z - x_0) dz = \quad (19a)$$

$$\int_{z \in \mathbb{R}^d} g(z) \nabla_x \nabla_x^T q_\Sigma(z - x_0) dz = \int_{z \in \mathbb{R}^d} g(z) (\nabla_x q_\Sigma(z - x_0) (z - x_0)^T \Sigma^{-1}) dz = \quad (19b)$$

$$\int_{z \in \mathbb{R}^d} g(z) ((\nabla_x (z - x_0)^T \Sigma^{-1}) q_\Sigma(z - x_0) + (\nabla_x q_\Sigma(z - x_0)) (z - x_0)^T \Sigma^{-1}) dz = \quad (19c)$$

$$\int_{z \in \mathbb{R}^d} g(z) (-I \Sigma^{-1} q_\Sigma(z - x_0) + (\nabla_x q_\Sigma(z - x_0)) (z - x_0)^T \Sigma^{-1}) dz = \quad (19d)$$

$$\int_{z \in \mathbb{R}^d} g(z) (-I \Sigma^{-1} q_\Sigma(z - x_0) + q_\Sigma(z - x_0) \Sigma^{-1} (z - x_0) (z - x_0)^T \Sigma^{-1}) dz = \quad (19e)$$

$$\int_{z \in \mathbb{R}^d} g(z) q_\Sigma(z - x_0) (-I \Sigma^{-1} + \Sigma^{-1} (z - x_0) (z - x_0)^T \Sigma^{-1}) dz = \quad (19f)$$

$$\int_{z \in \mathbb{R}^d} g(z) p_\Sigma(z) (-I \Sigma^{-1} + \Sigma^{-1} (z - x_0) (z - x_0)^T \Sigma^{-1}) dz = (p_\Sigma(z) = q_\Sigma(z - x_0)) \quad (19g)$$

$$\mathbb{E}_z[g(z) (-I \Sigma^{-1} + \Sigma^{-1} (z - x_0) (z - x_0)^T \Sigma^{-1})] = \quad (19h)$$

$$\mathbb{E}_z[g(z) \Sigma^{-1} (-I + (z - x_0) (z - x_0)^T \Sigma^{-1})] = \quad (19i)$$

$$\mathbb{E}_z[g(z) \Sigma^{-1} (-\Sigma + (z - x_0) (z - x_0)^T \Sigma^{-1})] = \quad (19j)$$

$$\mathbb{E}_z[\Sigma^{-1} ((z - x_0) (z - x_0)^T - \Sigma) \Sigma^{-1} g(z)] \quad (19k)$$

Lemma 3 may be applied as  $g$  is Lipschitz, and thus locally-Lipschitz, and  $\mathbb{E}_z[|g(z)|] < \infty$ , yielding

$$\mathbb{E}_z[\Sigma^{-1} ((z - x_0) (z - x_0)^T - \Sigma) \Sigma^{-1} g(z)] = \mathbb{E}_z[\Sigma^{-1} (z - x_0) [\nabla_z g(z)]^T] \quad (20)$$

Using a change of variables from  $z$  to  $x_0 + \delta$  we write

$$\mathbb{E}_z[\Sigma^{-1} (z - x_0) [\nabla_z g(z)]^T] = \mathbb{E}_\delta[\Sigma^{-1} \delta [\nabla_x g(x_0 + \delta)]^T] \quad (21)$$

which, when combined with Eq. (19) and Eq. (20), completes the proof

$$\nabla_x^2(g * q_\Sigma)(x_0) = \mathbb{E}_\delta[\Sigma^{-1} \delta [\nabla_x g(x_0 + \delta)]^T]. \quad (22)$$

□

## C Proof of Theorem 1

We begin by establishing a result expressing the eigenvalues of the symmetrization of a rank 1 matrix in closed form:

**Lemma 4.** *Given  $x, y \in \mathbb{R}^d$  denote  $A = xy^T + yx^T \in \mathbb{R}^{d \times d}$ . The following facts hold:*

1. *Matrix  $A$  will have the following eigenvalues*

- *It has  $d - 2$  eigenvalues equal to 0*

- The other two eigenvalues are denoted by  $\lambda^+(A)$  and  $\lambda^-(A)$  will have the following form:

$$\lambda^\pm(A) = x^T y \pm \|x\|_2 \|y\|_2 \quad (23)$$

2.  $\lambda^+(A)$  and  $\lambda^-(A)$  are non-negative and non-positive respectively.
3. Given  $x$  and  $y$  are sampled from sub-gaussian distributions, then  $\lambda^+(A)$  and  $\lambda^-(A)$  are sub-exponential random variables.

*Proof.* We divide the proof into three sections

1. We have  $\text{rank}(A) \leq 2$ ,  $A \in S_d$ . Therefore  $\exists Q = [e_1|e_2|\dots|e_d] \in \mathbb{R}^{d \times d}$  s.t.  $Q^T Q = Q Q^T = I$ , the column vectors  $e_i \in \mathbb{R}^d$  are orthonormal and

$$A = Q \Lambda Q^T \quad (24a)$$

$$Q^T A Q = \Lambda \quad (24b)$$

where  $\Lambda = \text{diag}([\lambda_1, \lambda_2, 0, \dots, 0]) \in \mathbb{R}^{d \times d}$ . As eigenvalues are invariant to change of basis,  $A$  has eigenvalues  $\lambda_1$  and  $\lambda_2$  and the other  $d - 2$  eigenvalues are equal to 0.

It can be seen that  $\text{span}(\{x, y\}) = \text{span}(\{e_1, e_2\})$ . As  $\text{span}(\{e_1, e_2\}) = C(A)$  this can be shown by proving  $\text{span}(\{x, y\}) = C(A)$ . We know  $\exists z_x \in \mathbb{R}^d : z_x \perp x$  and  $\exists z_y \in \mathbb{R}^d : z_y \perp y$ . Thus we have

$$A z_x = (x y^T + y x^T) z_x = x y^T z_x + y x^T z_x = x (y^T z_x) \quad (25a)$$

$$A z_y = (x y^T + y x^T) z_y = x y^T z_y + y x^T z_y = y (x^T z_y). \quad (25b)$$

From the above, we see that  $x, y \in C(A)$ . We know  $\text{rank}(A) \leq 2$ . If  $\text{rank}(A) = 2$  we have  $x \neq y$  and thus  $\text{span}(\{x, y\}) = C(A)$ . If  $\text{rank}(A) = 1$  we have  $x \neq 0, y \neq 0$  and still  $\text{span}(\{x, y\}) = C(A)$ . If  $\text{rank}(A) = 0$  we have  $x = y = 0$  and clearly  $\text{span}(\{x, y\}) = \{0\} = C(A)$ .

As  $\{e_i\}_{i=1}^d$  are orthonormal, we have that  $x^T e_j = y^T e_j = 0, \forall j > 2$ . We define

$$\bar{x} = Q^T x = (e_1^T x, e_2^T x, e_3^T x, \dots, e_d^T x) = (e_1^T x, e_2^T x, 0, \dots, 0) \in \mathbb{R}^d, \quad (26a)$$

$$\bar{y} = Q^T y = (e_1^T y, e_2^T y, e_3^T y, \dots, e_d^T y) = (e_1^T y, e_2^T y, 0, \dots, 0) \in \mathbb{R}^d \quad (26b)$$

We define  $Q_2 = [e_1|e_2] \in \mathbb{R}^{d \times 2}$  and

$$\tilde{x} = Q_2^T x = (e_1^T x, e_2^T x) \in \mathbb{R}^2 \quad (27a)$$

$$\tilde{y} = Q_2^T y = (e_1^T y, e_2^T y) \in \mathbb{R}^2 \quad (27b)$$

We first show that  $\|\bar{x}\|_2$  and  $\|\bar{y}\|_2$  are equal to  $\|x\|_2$  and  $\|y\|_2$  respectively:

$$\|\bar{x}\|_2 = \|Q^T x\|_2 = \sqrt{(Q^T x)^T (Q^T x)} = \sqrt{x^T Q Q^T x} = \sqrt{x^T I x} = \|x\|_2 \quad (28a)$$

$$\|\bar{y}\|_2 = \|Q^T y\|_2 = \sqrt{(Q^T y)^T (Q^T y)} = \sqrt{y^T Q Q^T y} = \sqrt{y^T I y} = \|y\|_2 \quad (28b)$$

Next, we use Eq. (28) to show that  $\|\tilde{x}\|_2$  and  $\|\tilde{y}\|_2$  are equal to  $\|x\|_2$  and  $\|y\|_2$  respectively:

$$\|\tilde{x}\|_2 = \sqrt{(e_1^T x)^2 + (e_2^T x)^2} = \|\bar{x}\|_2 = \|x\|_2 \quad (29a)$$

$$\|\tilde{y}\|_2 = \sqrt{(e_1^T y)^2 + (e_2^T y)^2} = \|\bar{y}\|_2 = \|y\|_2 \quad (29b)$$

We show an equality between inner products  $\tilde{x}^T \tilde{y} = x^T y$ :

$$\tilde{x}^T \tilde{y} = (e_1^T x)(e_1^T y) + (e_2^T x)(e_2^T y) = \bar{x}^T \bar{y} = (Q^T x)^T Q^T y = x^T Q Q^T y = \quad (30a)$$

$$x^T I y = x^T y \quad (30b)$$

Now, one may write,

$$Q_2^T A Q_2 = \text{diag}([\lambda_1, \lambda_2]) \quad (31a)$$

$$Q_2^T (xy^T + yx^T) Q_2 = \text{diag}([\lambda_1, \lambda_2]) \quad (31b)$$

$$Q_2^T xy^T Q_2 + Q_2^T yx^T Q_2 = \text{diag}([\lambda_1, \lambda_2]) \quad (31c)$$

$$\tilde{x}\tilde{y}^T + \tilde{y}\tilde{x}^T = \text{diag}([\lambda_1, \lambda_2]). \quad (31d)$$

The following facts hold as a result of Eq. (31d):

- $\lambda_1 = 2\tilde{x}_1\tilde{y}_1$
- $\lambda_2 = 2\tilde{x}_2\tilde{y}_2$
- $\tilde{x}_1\tilde{y}_2 + \tilde{x}_2\tilde{y}_1 = 0$

Now, we show

$$\lambda_1 = \tilde{x}^T \tilde{y} + \|\tilde{x}\|_2 \|\tilde{y}\|_2, \quad \lambda_2 = \tilde{x}^T \tilde{y} - \|\tilde{x}\|_2 \|\tilde{y}\|_2 \quad (32)$$

Which can be derived as such:

$$\begin{aligned} \tilde{x}^T \tilde{y} \pm \|\tilde{x}\|_2 \|\tilde{y}\|_2 &= \tilde{x}_1\tilde{y}_1 + \tilde{x}_2\tilde{y}_2 \pm \sqrt{(\tilde{x}_1^2 + \tilde{x}_2^2)(\tilde{y}_1^2 + \tilde{y}_2^2)} \\ &= \tilde{x}_1\tilde{y}_1 + \tilde{x}_2\tilde{y}_2 \pm \sqrt{(\tilde{x}_1\tilde{y}_1 - \tilde{x}_2\tilde{y}_2)^2} = \tilde{x}_1\tilde{y}_1 + \tilde{x}_2\tilde{y}_2 \pm |\tilde{x}_1\tilde{y}_1 - \tilde{x}_2\tilde{y}_2| = \lambda_1 \text{ or } \lambda_2 \end{aligned} \quad (33)$$

where the second equality comes from the following:

$$\begin{aligned} (\tilde{x}_1\tilde{y}_1 - \tilde{x}_2\tilde{y}_2)^2 &= (\tilde{x}_1\tilde{y}_1)^2 - 2\tilde{x}_1\tilde{x}_2\tilde{y}_1\tilde{y}_2 + (\tilde{x}_2\tilde{y}_2)^2 \\ &= (\tilde{x}_1\tilde{y}_1)^2 - 2\tilde{x}_1\tilde{x}_2\tilde{y}_1\tilde{y}_2 + (\tilde{x}_2\tilde{y}_2)^2 + (\tilde{x}_1\tilde{y}_2 + \tilde{x}_2\tilde{y}_1)^2 \\ &= (\tilde{x}_1^2 + \tilde{x}_2^2)(\tilde{y}_1^2 + \tilde{y}_2^2). \end{aligned} \quad (34)$$

Proving that Eq. (32) holds. Finally, we combine Eq. (29) and Eq. (30) with Eq. (32) to express the eigenvalues of  $A$  as:

$$\lambda_1 = x^T y + \|x\|_2 \|y\|_2, \quad \lambda_2 = x^T y - \|x\|_2 \|y\|_2 \quad (35)$$

which we use to denote  $\lambda^+(A) = \lambda_1, \lambda^-(A) = \lambda_2$ .

2. As  $|x^T y| \leq \|x\|_2 \|y\|_2$ , it follows that  $\lambda^+(A) = x^T y + \|x\|_2 \|y\|_2 \geq 0$  and  $\lambda^-(A) = x^T y - \|x\|_2 \|y\|_2 \leq 0$ .
3. We denote  $D = \{1, \dots, d\}$ . It can be seen that  $x_i y_i$  is sub-exponential  $\forall i \in D$ , as a sub-gaussian times a sub-gaussian is sub exponential. Thus, it follows that

$$x^T y = \sum_{i=1}^d x_i y_i \text{ is a sub-exponential random variable,} \quad (36)$$

as the sum of sub-exponential random variables is sub-exponential. Further we see that  $x_i^2$  and  $y_i^2$  are sub-exponential as the square of a sub-gaussian is sub-exponential. As the sum of sub-exponentials is sub-exponential we have that  $\sum_{i=1}^d x_i^2, \sum_{i=1}^d y_i^2$  are both sub-exponential random variables. As the square root of a sub-exponential is sub-gaussian we have that

$$\|x\|_2 = \sqrt{\sum_{i=1}^d x_i^2} \text{ is a sub-gaussian random variable} \quad (37a)$$

$$\|y\|_2 = \sqrt{\sum_{i=1}^d y_i^2} \text{ is a sub-gaussian random variable} \quad (37b)$$

As a sub-gaussian times a sub-gaussian is sub-exponential, from Eq. 37 we have that

$$\|x\|_2 \|y\|_2 \text{ is a sub-exponential random variable.} \quad (38)$$

Now we see from Eq. and 36 Eq. 38 that both  $\lambda^+(A)$  and  $\lambda^-(A)$  are the sum of sub-exponential random variables and thus are sub-exponential.

□

We now use the result of Lemma 4 to prove the sample complexity bounds for SmoothHess in Theorem 1:

**Theorem 1.** Let  $f : \mathbb{R}^d \rightarrow \mathbb{R}$  be a piece-wise linear function over a finite partition of  $\mathbb{R}^d$ . Let  $x_0 \in \mathbb{R}^d$ , and denote  $\{\delta_i\}_{i=1}^n$ , a set of  $n$  i.i.d random vectors in  $\mathbb{R}^d$  distributed from  $\delta_i \sim \mathcal{N}(0, \Sigma)$ . Given  $\hat{H}_n(x_0, f, \Sigma)$  as in Eq. (8), for any fixed  $\varepsilon, \gamma \in (0, 1]$ , given  $n \geq \frac{4}{\varepsilon^2} [\max((C^+ \sqrt{d} + \sqrt{\frac{1}{c^+} \log \frac{4}{\gamma}})^2, (C^- \sqrt{d} + \sqrt{\frac{1}{c^-} \log \frac{4}{\gamma}})^2)]$  then

$$\mathbb{P}\left(\|\hat{H}_n - H\|_2 > \varepsilon\right) \leq \gamma. \quad (9)$$

where  $H = \nabla_x^2[(f * q_\Sigma)(x_0)]$ ,  $C^+, C^- c^+, c^- > 0$  are constants depending on the function  $f$  and covariance  $\Sigma$  and  $q_\Sigma : \mathbb{R}^d \rightarrow \mathbb{R}$  is the density function of  $\mathcal{N}(0, \Sigma)$ .

*Proof.* As  $x_0, f$  and  $\Sigma$  are fixed, we refer to  $\hat{H}_n(f, x_0, \Sigma)$  as  $\hat{H}_n$  for brevity. We denote  $D = \{1, \dots, d\}$ . We begin by explicitly expressing our estimator  $\hat{H}_n$  in terms of  $\delta_i$  and  $\nabla_x f(x_0 + \delta_i)$ . From Eq. (8) we have

$$H_n^\circ = \frac{1}{n} \sum_{i=1}^n \Sigma^{-1} \delta_i [\nabla_x f(x_0 + \delta_i)]^T \quad (39a)$$

$$\hat{H}_n = \frac{1}{2} H_n^\circ + \frac{1}{2} H_n^{\circ T} = \quad (39b)$$

$$\frac{1}{2} \frac{1}{n} \sum_{i=1}^n (\Sigma^{-1} \delta_i [\nabla_x f(x_0 + \delta_i)]^T) + \frac{1}{2} \frac{1}{n} \sum_{i=1}^n (\nabla_x f(x_0 + \delta_i) \delta_i^T \Sigma^{-1}) \quad (39c)$$

Now, we show the convergence of our estimator  $\hat{H}_n$ :

**Lemma 5.**  $\lim_{n \rightarrow \infty} \hat{H}_n = H$

*Proof.* From Proposition 1 it is clear to see that  $\lim_{n \rightarrow \infty} H_n^\circ = H$ :

$$\lim_{n \rightarrow \infty} H_n^\circ = \lim_{n \rightarrow \infty} \frac{1}{n} \sum_{i=1}^n \Sigma^{-1} \delta_i [\nabla_x f(x_0 + \delta_i)]^T = \mathbb{E}_\delta[\Sigma^{-1} \delta [\nabla_x f(x_0 + \delta)]^T] \stackrel{\text{Prop 1}}{=} H. \quad (40)$$

Next, we show it is also the case that  $\lim_{n \rightarrow \infty} H_n^{\circ T} = H$ :

$$\lim_{n \rightarrow \infty} H_n^{\circ T} = \lim_{n \rightarrow \infty} \frac{1}{n} \sum_{i=1}^n \nabla_x f(x_0 + \delta_i) \delta_i^T \Sigma^{-1} = \quad (41a)$$

$$\lim_{n \rightarrow \infty} \frac{1}{n} \sum_{i=1}^n (\Sigma^{-1} \delta_i [\nabla_x f(x_0 + \delta_i)]^T)^T = \left( \lim_{n \rightarrow \infty} \frac{1}{n} \sum_{i=1}^n \Sigma^{-1} \delta_i [\nabla_x f(x_0 + \delta_i)]^T \right)^T = \quad (41b)$$

$$(\mathbb{E}_\delta[\Sigma^{-1} \delta [\nabla_x f(x_0 + \delta)]^T])^T \stackrel{\text{Prop 1}}{=} H^T = H \quad (\text{Symmetry of Hessian}) \quad (41c)$$

Now, as we have  $\lim_{n \rightarrow \infty} H_n^\circ = \lim_{n \rightarrow \infty} H_n^{\circ T} = H$ , it follows that

$$\lim_{n \rightarrow \infty} \hat{H}_n = \lim_{n \rightarrow \infty} \frac{1}{2} H_n^\circ + \lim_{n \rightarrow \infty} \frac{1}{2} H_n^{\circ T} = \frac{1}{2} H + \frac{1}{2} H = H \quad (42)$$

□

We establish the following notation to be used below: given a fixed vector  $\delta \in \mathbb{R}^d$  one may construct matrix  $A_\delta \in \mathbb{R}^{d \times d}$  by:

$$A_\delta = \frac{1}{2} (\Sigma^{-1} \delta [\nabla_x f(x_0 + \delta)]^T) + \frac{1}{2} (\nabla_x f(x_0 + \delta) \delta^T \Sigma^{-1}) \in \mathbb{R}^{d \times d} \quad (43)$$

It can be seen from Eq. 39 and Lemma 5 that  $H$  and  $\hat{H}_n$  may be expressed in terms of matrices  $A_\delta$  and  $A_{\delta_i}$ :

$$H = \mathbb{E}_\delta[A_\delta], \quad \hat{H}_n = \frac{1}{n} \sum_{i=1}^n A_{\delta_i} \quad (44)$$

Next, we establish that the random vectors  $\Sigma^{-1}\delta$  and  $\nabla f(x_0 + \delta)$  are sub-gaussian:

**Lemma 6.** *The random vectors  $\Sigma^{-1}\delta$  and  $\nabla f(x_0 + \delta)$  are sub-gaussian.*

*Proof.* As  $\Sigma^{-1}\delta$  is Gaussian it is sub-gaussian. Now, we show that  $\nabla f(x_0 + \delta)$  is a sub-gaussian random-vector. We have that  $f$  is piecewise-linear over a partition of  $\mathbb{R}^d$  with finite cardinality  $L$ . Let us denote this partition as  $\mathcal{Q} = \{Q_i\}_{i=1}^L$ ,  $Q_i \subseteq \mathbb{R}^d$ , where, when restricted to a given  $Q \in \mathcal{Q}$  we have

$$f|_Q(x) = V_Q x + A_Q \quad (45)$$

where  $V_Q \in \mathbb{R}^d$ ,  $A_Q \in \mathbb{R}$  are the affine coefficients associated with the region  $Q$ . Then it is the case that  $\nabla f : \mathbb{R}^d \rightarrow \mathbb{R}$  is a bounded function, where, aside from a set of measure 0,  $M \subseteq \mathbb{R}^d$  (the boundaries of regions  $Q$ ) where  $\nabla f$  is not defined, one has

$$\|\nabla f(x)\|_2 \leq \max_{Q \in \mathcal{Q}} \|V_Q\|_2, \quad \forall x \in \mathbb{R}^d \setminus M. \quad (46)$$

Thus,  $\nabla f(x_0 + \delta)$  is a bounded random vector and therefore is sub-gaussian.  $\square$

Given the operators  $\lambda^+, \lambda^- : \mathbb{R}^{d \times d} \rightarrow \mathbb{R}$  as defined in the statement of Lemma 4 and fixed vector  $\delta \in \mathbb{R}^d$ , we denote  $\lambda_\delta^+ := \lambda^+(A_\delta)$ ,  $\lambda_\delta^- := \lambda^-(A_\delta)$  and the corresponding unit eigenvectors as  $v_\delta^+ \in \mathbb{R}^d$  and  $v_\delta^- \in \mathbb{R}^d$  respectively. We denote random vectors  $w_\delta^+, w_\delta^- \in \mathbb{R}^d$  by

$$w_\delta^+ = \sqrt{\lambda_\delta^+} v_\delta^+, \quad w_\delta^- = \sqrt{-\lambda_\delta^-} v_\delta^- \quad (47)$$

where  $\sqrt{\lambda_\delta^+}$  and  $v_\delta^+$  are a random variable random vector pair coming from the same  $\delta$ . An immediate consequence of Lemma 6 is that  $w_\delta^+$  and  $w_\delta^-$  are sub-gaussian random vectors:

**Lemma 7.**  *$w_\delta^+$  and  $w_\delta^-$  are sub-gaussian random-vectors*

*Proof.* Using Lemma 4(3), Lemma 4(2) and Lemma 6 we see that that  $\lambda_\delta^+$  and  $-\lambda_\delta^-$  are non-negative sub-exponential random variables and thus that  $\sqrt{\lambda_\delta^+}$  and  $\sqrt{-\lambda_\delta^-}$  are sub-gaussian random variables. We may say  $w_\delta^+$  is a sub-gaussian random vector if  $\langle w_\delta^+, z \rangle$  is a sub-gaussian random variable  $\forall z \in \mathbb{R}^d$ . Let us fix arbitrary  $z \in \mathbb{R}^d$ . As  $\sqrt{\lambda_\delta^+}$  is sub-gaussian we have

$$\exists K_1 > 0 \text{ s.t. } \mathbb{P}(|\sqrt{\lambda_\delta^+}| \geq t) \leq 2 \exp(-t^2/K_1^2) \quad \forall t \geq 0 \quad (48a)$$

Now,  $\forall t \geq 0$

$$\mathbb{P}(|\langle w_\delta^+, z \rangle| \geq t) = \mathbb{P}(|\sqrt{\lambda_\delta^+} \langle v_\delta^+, z \rangle| \geq t) = \quad (49a)$$

$$\mathbb{P}(|\sqrt{\lambda_\delta^+}| \geq t/|\langle v_\delta^+, z \rangle|) \stackrel{\text{C.S., } \|v_\delta^+\|_2=1}{\leq} \mathbb{P}(|\sqrt{\lambda_\delta^+}| \geq t/\|z\|_2) \leq 2 \exp(-(t^2/\|z\|_2^2 K_1^2)) \quad (49b)$$

Thus defining  $K_1^{(z)} := K_1 \|z\|_2$  we see that  $\forall t \geq 0$

$$\mathbb{P}(|\langle w_\delta^+, z \rangle| \geq t) \leq \exp(-t^2/(K_1^{(z)})^2). \quad (50)$$

Thus  $\langle w_\delta^+, z \rangle$  is sub-gaussian for arbitrary  $z \in \mathbb{R}^d$ . Therefore,  $w_\delta^+$  is a sub-gaussian random-vector. The same argument holds to show that  $w_\delta^-$  is a sub-gaussian random vector.  $\square$

Given any fixed  $\delta$ , it can be seen that

$$A_\delta = w_\delta^+ w_\delta^{+T} - w_\delta^- w_\delta^{-T}. \quad (51)$$

Thus one may re-write  $H$  and  $\hat{H}_n$  from Eq. 44 as:

$$H = \mathbb{E}_\delta[A_\delta] = \mathbb{E}_\delta[w_\delta^+ w_\delta^{+T} - w_\delta^- w_\delta^{-T}], \quad \hat{H}_n = \frac{1}{n} \sum_{i=1}^n A_{\delta_i} = \frac{1}{n} \sum_{i=1}^n w_{\delta_i}^+ w_{\delta_i}^{+T} - w_{\delta_i}^- w_{\delta_i}^{-T}. \quad (52)$$

Because  $\{\delta_i\}_{i=1}^n$  are i.i.d. random vectors and  $w_{\delta_i}^+, w_{\delta_i}^-$  are fully determined by  $\delta_i$ , it follows that  $\{w_{\delta_i}^+\}_{i=1}^n$  and  $\{w_{\delta_i}^-\}_{i=1}^n$  are both sets of i.i.d. random vectors.

We denote the following:

$$H^+ = \mathbb{E}_\delta[w_\delta^+ w_\delta^{+T}], \quad H^- = \mathbb{E}_\delta[w_\delta^- w_\delta^{-T}], \quad (53a)$$

$$\hat{H}_n^+ = \frac{1}{n} \sum_{i=1}^n w_{\delta_i}^+ w_{\delta_i}^{+T}, \quad \hat{H}_n^- = \frac{1}{n} \sum_{i=1}^n w_{\delta_i}^- w_{\delta_i}^{-T} \quad (53b)$$

It can be seen from the RHS of Eq. (52) that

$$\hat{H}_n = \hat{H}_n^+ - \hat{H}_n^-. \quad (54)$$

We now aim to decompose  $H$  in terms of  $H^+, H^-$ , in order to derive separate concentration bounds. To this end, we prove the following lemma:

**Lemma 8.**  $H^+$  and  $H^-$  exist.

*Proof.* Let us consider the random matrix  $w_\delta^+ w_\delta^{+T} \in \mathbb{R}^{d \times d}$ . As  $(w_\delta^+)_k \in \mathbb{R}$  is sub-gaussian  $\forall k \in D$ , the element  $(w_\delta^+ w_\delta^{+T})_{ij} \in \mathbb{R}$  is sub-exponential as the product of two sub-gaussian's,  $\forall i, j \in D$ . Thus,  $\mathbb{E}_\delta[(w_\delta^+ w_\delta^{+T})_{ij}]$  exists  $\forall i, j \in D$ . The same argument can be made to show  $\mathbb{E}_\delta[(w_\delta^- w_\delta^{-T})_{ij}]$  exists  $\forall i, j \in D$ .  $\square$

In light of Lemma 8, the LHS of Eq. (52) may be decomposed as

$$H = \mathbb{E}_\delta[w_\delta^+ w_\delta^{+T} - w_\delta^- w_\delta^{-T}] = \mathbb{E}_\delta[w_\delta^+ w_\delta^{+T}] - \mathbb{E}_\delta[w_\delta^- w_\delta^{-T}] = H^+ - H^-. \quad (55)$$

Before deriving separate concentration bounds on  $\hat{H}_n^+$  and  $\hat{H}_n^-$  we note that

$$\lim_{n \rightarrow \infty} \hat{H}_n^+ = \mathbb{E}_\delta[w_\delta^+ w_\delta^{+T}], \quad \lim_{n \rightarrow \infty} \hat{H}_n^- = \mathbb{E}_\delta[w_\delta^- w_\delta^{-T}]. \quad (56)$$

Finally, we bound the deviation of  $\hat{H}_n^+$  and  $\hat{H}_n^-$  from their expectations. Let us fix  $\varepsilon, \gamma \in (0, 1]$ . From Eq. (55), and the fact that  $\{w_{\delta_i}^+\}_{i=1}^n$  is a set of i.i.d. sub-gaussian random vectors, Theorem 3.39, Remark 3.40 of Vershynin [87] may be applied, yielding:  $\forall t \geq 0$

$$\mathbb{P}\left(\|\hat{H}_n^+ - H^+\|_2 > \max(\varepsilon_n^+, (\varepsilon_n^+)^2)\right) \leq 2 \exp(-c^+ t^2) \quad (57)$$

where  $\varepsilon_n^+ = C^+ \frac{\sqrt{d}}{\sqrt{n}} + \frac{t}{\sqrt{n}}$  and  $C^+, c^+ > 0$  are constants depending on the sub-gaussian norm of  $w_{\delta_i}^+$ . Let us select  $t = \sqrt{\frac{\log(4/\gamma)}{c^+}}$ . Plugging into Eq. (57), we get

$$\mathbb{P}\left(\|\hat{H}_n^+ - H^+\|_2 > \max\left(C^+ \frac{\sqrt{d}}{\sqrt{n}} + \frac{\sqrt{\frac{\log(4/\gamma)}{c^+}}}{\sqrt{n}}, \left(C^+ \frac{\sqrt{d}}{\sqrt{n}} + \frac{\sqrt{\frac{\log(4/\gamma)}{c^+}}}{\sqrt{n}}\right)^2\right)\right) \leq \frac{\gamma}{2} \quad (58)$$

Let us consider  $n^+ = \frac{4}{\varepsilon^2}(C^+\sqrt{d} + \sqrt{\frac{\log(4/\gamma)}{c^+}})^2$ . One may see that

$$\varepsilon_{n^+}^+ = C^+ \frac{\sqrt{d}}{\sqrt{n^+}} + \frac{\sqrt{\frac{\log(4/\gamma)}{c^+}}}{\sqrt{n^+}} = \quad (59a)$$

$$C^+ \frac{\varepsilon\sqrt{d}}{2(C^+\sqrt{d} + \sqrt{\frac{\log(4/\gamma)}{c^+}})} + \frac{\varepsilon\sqrt{\frac{\log(4/\gamma)}{c^+}}}{2(C^+\sqrt{d} + \sqrt{\frac{\log(4/\gamma)}{c^+}})} = \quad (59b)$$

$$\frac{\varepsilon}{2} \frac{C^+\sqrt{d} + \sqrt{\frac{\log(4/\gamma)}{c^+}}}{C^+\sqrt{d} + \sqrt{\frac{\log(4/\gamma)}{c^+}}} = \frac{\varepsilon}{2} \quad (59c)$$

Thus, given  $n = n^+$  one has  $\varepsilon_n^+ = \max(\frac{\varepsilon}{2}, (\frac{\varepsilon}{2})^2) = \frac{\varepsilon}{2}$ , because  $\frac{\varepsilon}{2} < \varepsilon \leq 1$ , and that

$$\mathbb{P}\left(\|\hat{H}_n^+ - H^+\|_2 > \frac{\varepsilon}{2}\right) \leq \frac{\gamma}{2}. \quad (60)$$

In fact, because  $\varepsilon_n^+$  is monotonically decreasing in  $n$ , given  $n \geq n^+$  Eq. (60) holds.

The same logic above may be used to show that there exists constants  $C^-, c^- > 0$  depending on the sub-gaussian norm of  $w_\delta^-$  such that, given  $n \geq n^- = \frac{4}{\varepsilon^2}(C^-\sqrt{d} + \sqrt{\frac{\log(4/\gamma)}{c^-}})^2$  one has

$$\mathbb{P}\left(\|\hat{H}_n^- - H^-\|_2 > \frac{\varepsilon}{2}\right) \leq \frac{\gamma}{2}. \quad (61)$$

Finally, we combine the two bounds from Eq. (61) and Eq. (60). Given  $n \geq \max(\frac{4}{\varepsilon^2}(C^+\sqrt{d} + \sqrt{\frac{\log(4/\gamma)}{c^+}})^2, \frac{4}{\varepsilon^2}(C^-\sqrt{d} + \sqrt{\frac{\log(4/\gamma)}{c^-}})^2)$  we have

$$\mathbb{P}(\|\hat{H}_n - H\|_2 > \varepsilon) = \mathbb{P}(\|\hat{H}_n^+ - \hat{H}_n^- - H^+ + H^-\|_2 > \varepsilon) = \quad (\text{Eq. (55)Eq. (54)}) \quad (62a)$$

$$\mathbb{P}(\|(\hat{H}_n^+ - H^+) - (\hat{H}_n^- - H^-)\|_2 > \varepsilon) \leq \quad (62b)$$

$$\mathbb{P}(\|(\hat{H}_n^+ - H^+)\|_2 + \|(\hat{H}_n^- - H^-)\|_2 > \varepsilon) \leq \quad (\Delta - \text{Ineq.}) \quad (62c)$$

$$\mathbb{P}(\|\hat{H}_n^+ - H^+\|_2 > \frac{\varepsilon}{2} \cup \|\hat{H}_n^- - H^-\|_2 > \frac{\varepsilon}{2}) \leq \quad (62d)$$

$$\mathbb{P}(\|\hat{H}_n^+ - H^+\|_2 > \frac{\varepsilon}{2}) + \mathbb{P}(\|\hat{H}_n^- - H^-\|_2 > \frac{\varepsilon}{2}) \leq \quad (\text{Union bound}) \quad (62e)$$

$$\frac{\gamma}{2} + \frac{\gamma}{2} = \gamma \quad (\text{Eq. (60)Eq. (61)}) \quad (62f)$$

□

## D Implementation Details

### D.1 Quadratic Optimization

Given a function  $f : \mathbb{R}^d \rightarrow \mathbb{R}$ , point  $x_0 \in \mathbb{R}^d$  gradient Hessian pair  $G \in \mathbb{R}^d, H \in \mathbb{R}^{d \times d}$  and a magnitude constraint  $\varepsilon > 0$ , we aim to solve the following optimization:

$$\min_{\Delta \in \mathbb{R}^d} f(x_0) + G^T(\Delta - x_0) + \frac{1}{2}(\Delta - x_0)^T H(\Delta - x_0), \quad s.t. \quad \|\Delta - x_0\|_2 \leq \varepsilon, \quad (63)$$

as  $f(x_0)$  is constant, the problem above is equivalent to

$$\min_{\delta \in \mathbb{R}^d} G^T \delta + \frac{1}{2} \delta^T H \delta, \quad s.t. \quad \|\delta\|_2 \leq \varepsilon, \quad (64)$$

where we have replaced  $\Delta - x_0$ , which can be interpreted as the output after the attack with  $\delta = \Delta - x_0$ , the attack vector itself.



The optimization problem in Eq. (64) is non-convex as  $H$  is not guaranteed to be positive semi-definite. However, as Slater’s constraint qualification is satisfied, i.e.  $\exists \delta \in \mathbb{R}^d$  s.t.  $\|\delta\|_2 < \varepsilon$ , Eq. (64) may be solved exactly[12]. Specifically, the solution may be obtained by solving an equivalent convex optimization problem:

$$\min_{\gamma \in \mathbb{R}^d, X \in S^d} \text{tr}\left(\frac{1}{2}HX\right) + G^T\gamma, \quad (65a)$$

$$\text{s.t. } \text{tr}(X) - \varepsilon^2 \leq 0, \quad (65b)$$

$$[X, \gamma; \gamma^T, 1] \succeq 0 \quad (65c)$$

where  $S^d$  denotes the set of symmetric matrices and  $\succeq$  indicates the block matrix  $[X, \gamma; \gamma^T, 1] \in \mathbb{R}^{(d+1) \times (d+1)}$  is constrained to be positive semi-definite.

However, the optimization in Eq. (65) is expensive to solve when  $d \gg 0$  as there are  $\mathcal{O}(d^2)$  variables. For instance, MNIST and FMNIST have  $d^2 \approx 6.0 \cdot 10^6$  and CIFAR10 has  $d^2 \approx 10^8$ . Thus, before converting Eq. (64) into Eq. (65), we elect to reduce the dimension of the optimization problem to  $k \in \mathbb{N}, k \ll d$ .

Let us consider the eigendecomposition  $Q\Lambda Q^T = H$ . Here the columns of  $Q \in \mathbb{R}^{d \times d}$  are orthonormal eigenvectors of  $H$ . Given the  $d$  eigenvalues  $\{\lambda_1, \dots, \lambda_d\}$ , sorted such that  $i < j \implies |\lambda_i| \geq |\lambda_j|$ , we have  $\Lambda = \text{diag}(\lambda_1, \dots, \lambda_d)$ . We remove the last  $d - k$  columns from  $Q$  and  $d - k$  columns and rows from  $\Lambda$  to construct  $\tilde{Q} \in \mathbb{R}^{d \times k}, \tilde{\Lambda} \in \mathbb{R}^{k \times k}$ . Thus, we have a low-rank approximation of  $H$ :

$$H \simeq \tilde{Q}\tilde{\Lambda}\tilde{Q}^T. \quad (66)$$

Thus, Eq. (64) is approximately equivalent to another optimization which uses this low-rank approximation for  $H$ :

$$\min_{\delta \in \mathbb{R}^d} G^T\delta + \frac{1}{2}\delta^T\tilde{Q}\tilde{\Lambda}\tilde{Q}^T\delta, \quad \text{s.t. } \|\delta\|_2 \leq \varepsilon. \quad (67)$$

Defining  $\tilde{\delta} = \tilde{Q}^T\delta \in \mathbb{R}^k$ , Eq. (67) is approximately equivalent to

$$\min_{\tilde{\delta} \in \mathbb{R}^k} G^T\tilde{Q}\tilde{\delta} + \frac{1}{2}\tilde{\delta}^T\tilde{\Lambda}\tilde{\delta}, \quad \text{s.t. } \|\tilde{\delta}\|_2 \leq \varepsilon, \quad (68)$$

where the constraint is simplified to  $\|\tilde{\delta}\|_2 \leq \varepsilon$  from  $\|\tilde{Q}\tilde{\delta}\|_2 \leq \varepsilon$  as

$$\|\tilde{Q}\tilde{\delta}\|_2 = ((\tilde{Q}\tilde{\delta})^T(\tilde{Q}\tilde{\delta}))^{\frac{1}{2}} = (\tilde{\delta}^T\tilde{Q}^T\tilde{Q}\tilde{\delta})^{\frac{1}{2}} = (\tilde{\delta}^T\tilde{Q}^T\tilde{Q}\tilde{\delta})^{\frac{1}{2}} = (\tilde{\delta}^T I \tilde{\delta})^{\frac{1}{2}} = \|\tilde{\delta}\|_2. \quad (69)$$

Finally,  $\tilde{\delta}^* \in \mathbb{R}^k$ , the optimal solution to Eq. (68), is projected back to  $\mathbb{R}^d$  yielding an approximate solution to Eq. (67):

$$\delta^* = \tilde{Q}\tilde{\delta}^* \in \mathbb{R}^d. \quad (70)$$

**Choosing  $k$ :** The choice of  $k \in \mathbb{N}$  is determined using a threshold hyperparameter  $T \in (0, 1]$ . Given  $T$ ,  $k$  is chosen to be the smallest number of (sorted) eigenvalues/eigenvectors which account for a proportion of the total eigenvalue magnitude that is at least  $T$ :

$$k = \underset{k'}{\text{argmin}} \left\{ k' \in \mathbb{N} : \sum_{i=1}^{k'} |\lambda_i| \geq T \sum_{i=1}^d |\lambda_i| \right\} \quad (71)$$

For the values of  $T$  used for each dataset see App. E

#### D.1.1 Similarities and Differences with CASO/CAFO

Our quadratic optimization is closely connected to the CAFO/CASO explanation vectors proposed by Singla et al. [74]. Both methods use optimizations to minimize a value outputted by the network, and the CASO method also uses a second-order Taylor expansion in their objective. Additionally, the proposed Smooth-CASO method is equivalent to an attack using SmoothGrad and SmoothHess on the cross-entropy loss function (when their regularizers are set to 0), which admits higher order derivatives.

However, there are some key differences. First, our optimization is meant for use with arbitrary network outputs as opposed to just the loss, as is the case with CAFO/CASO. While the vanilla loss Hessian modeled by Singla et al. [74] is proven to be positive semi-definite, this is not the case for arbitrary functions which one may wish to attack. Thus methods to optimize non-convex quadratic objectives, such as those outlined in App. D.1, are required. Second, our goal is not to generate an explanatory feature importance vector for analysis, as is an important motivation for CAFO/CASO, but to assess the quality of the gradient Hessian pair used to attack the function. For this reason, we do not use sparsity constraints such as in Singla et al. [74], which are in part meant to improve the interpretability of CAFO/CASO as explainers. Last we stress that the techniques used to find the cross-entropy loss Hessian for CASO and Smooth-CASO *cannot be used* for internal neurons, logits or regression valued output in ReLU networks, due to their piecewise-linearity.

## D.2 SmoothHess

The SmoothHess estimation procedure, and the amortization with SmoothGrad estimation, is presented below in Algorithm 1. While empirically our SmoothHess estimator converges, we have additionally found that reflecting each point  $\delta_i$  in the perturbation set  $\{\delta_i\}_{i=1}^n$  about the origin to create an augmented perturbation set  $\{\delta_i\}_{i=1}^n \cup \{-\delta_i\}_{i=1}^n$  before estimation can result in faster per-sample convergence.

---

### Algorithm 1 Joint SmoothHess and SmoothGrad Estimation

---

**Input :** Sample of interest  $x \in \mathbb{R}^d$ , Neural network indexed to output scalar of interest  $f : \mathbb{R}^d \rightarrow \mathbb{R}$ , Covariance  $\Sigma \in \mathbb{R}^{d \times d}$ , Batch size for gradient oracle calls  $n_1 \in \mathbb{N}$ , Number of batches  $n_2 \in \mathbb{N}$ .

**Output :**  $\hat{H}$  an estimate of SmoothHess,  $\hat{G}$  an estimate of SmoothGrad

```

 $\hat{H}, \hat{G} \leftarrow \text{torch.zeros}(d, d), \text{torch.zeros}(d)$   $\quad \quad \quad \backslash \backslash \hat{H} \in \mathbb{R}^{d \times d}, \hat{G} \in \mathbb{R}^d$ 
 $\Sigma^{-1} \leftarrow \text{torch.inverse}(\Sigma)$   $\quad \quad \quad \backslash \backslash \Sigma^{-1} \in \mathbb{R}^{d \times d}, \text{If } \Sigma \text{ diagonal } \mathcal{O}(d), \text{ Else } \mathcal{O}(d^3)$ 

 $\backslash \backslash \mathcal{O}(n_1 n_2 (W + d^2))$ ,  $\mathcal{O}(W)$  is complexity of one forward pass through  $f$ 
for  $i = 1, \dots, n_2$  do
     $\delta \leftarrow \text{torch.normal}(n_1, 0, \Sigma)$   $\quad \quad \quad \backslash \backslash \delta \in \mathbb{R}^{n_1 \times d}$ 
     $\nabla f(x + \delta) \leftarrow \text{torch.autograd}(f, x + \delta)$   $\quad \quad \quad \backslash \backslash \nabla f(x + \delta) \in \mathbb{R}^{n_1 \times d}, \mathcal{O}(n_1 W)$ 
     $\hat{A}_i \leftarrow \text{torch.matmul}(\delta, \nabla f(x + \delta).T)$   $\quad \quad \quad \backslash \backslash \hat{A}_i \in \mathbb{R}^{d \times d}, \mathcal{O}(n_1 d^2)$ 
     $\hat{H} \leftarrow \hat{H} + \hat{A}_i / n_1 n_2$   $\quad \quad \quad \backslash \backslash \mathcal{O}(n_1 d^2)$ 
     $\hat{G} \leftarrow \hat{G} + \nabla f(x + \delta).sum(dim = 0) / n_1 n_2$   $\quad \quad \quad \backslash \backslash \mathcal{O}(n_1 d)$ 
end
 $\hat{H} \leftarrow \text{torch.matmul}(\Sigma^{-1}, \hat{H})$   $\quad \quad \quad \backslash \backslash \text{If } \Sigma \text{ diagonal } \mathcal{O}(d^2), \text{ Else } \mathcal{O}(d^3)$ 
 $\hat{H} \leftarrow \hat{H} + \hat{H}.T$   $\quad \quad \quad \backslash \backslash \mathcal{O}(d^2)$ 

Return  $\hat{H}, \hat{G}$ 

```

---

## D.3 Alternative Covariance Matrices

While in this work we use isotropic covariance matrices of the form  $\Sigma = \sigma^2 I, \sigma > 0$ , SmoothHess can be estimated using arbitrary positive definite covariance matrices  $\Sigma \in \mathbb{R}^{d \times d}$ . Such a covariance matrix can be set according to the users preference, encoded using the fact that the eigenvectors of  $\Sigma$  represent directions of interest and their corresponding eigenvalues represent levels of smoothing.

In the simplest case the user already has an orthonormal eigenvector basis in mind,  $a_1, \dots, a_d \in \mathbb{R}^d$  as well as desired levels of smoothing  $\sigma_1, \dots, \sigma_d > 0$ . In this case  $\Sigma$  may be set by constructing eigenvector and eigenvalue matrices  $Q = [a_1 | \dots | a_d] \in \mathbb{R}^{d \times d}$  and  $\Lambda = \text{diag}(\sigma_1, \dots, \sigma_d) \in \mathbb{R}^{d \times d}$  and simply multiplying  $\Sigma = Q \Lambda Q^T$ .

Alternatively, the user may only have  $k < d$  orthonormal eigenvectors in mind,  $a_1, \dots, a_k \in \mathbb{R}^d$ , for which they wish to smooth at specific levels  $\sigma_1, \dots, \sigma_k > 0$ . A procedure such as Gram-Schmidt may be used to find  $a_{k+1}, \dots, a_d \in \mathbb{R}^d$  which extends  $a_1, \dots, a_k$  to an orthonormal basis of  $\mathbb{R}^d$ . Again, the smoothing levels along the eigenvectors  $a_{k+1}, \dots, a_d$  may be chosen according to user preference. For instance, one may select  $\sigma_{k+1} = \dots = \sigma_d \approx 0$  if minimal smoothing is desired along these directions. Just as above  $\Sigma$  may be set by constructing eigenvector and eigenvalue matrices  $Q = [a_1 | \dots | a_d] \in \mathbb{R}^{d \times d}$  and  $\Lambda = \text{diag}(\sigma_1, \dots, \sigma_d) \in \mathbb{R}^{d \times d}$  and simply multiplying  $\Sigma = Q \Lambda Q^T$ .

## E Experiment Setup

### E.1 Datasets and Models

In this work we make use of six datasets, two synthetic datasets (Four Quadrants, Nested Interactions) three benchmark datasets (MNIST, FMNIST, CIFAR10) and a real world medical dataset (Spirometry). Below we describe these datasets and training details.

**Four Quadrant.** The Four Quadrant dataset consists of points  $x \in \mathbb{R}^2$  sampled from the grid  $[-2, 2] \times [-2, 2]$  with a spacing of 0.008. A 6-layer fully connected ReLU network was trained using RMSProp [83] on the Four Quadrant dataset achieving a final mean-squared-error of  $\approx 1e-4$ . Training lasted for 40,000 iterations with a batch size of 128 and a starting learning rate of  $1e-3$  which was decayed by a factor of  $1e-1$  at iterations 5000, 10,000 and 20,000.

**Nested Interactions.** The Nested Interactions dataset consists of points  $x \in \mathbb{R}^2$  sampled from the grid  $[-2, 2] \times [-2, 2]$  with a spacing of 0.008. A 6-layer fully connected ReLU network was trained using RMSProp on the Nested Interactions dataset achieving a final mean-squared-error of  $\approx 1e-1$ . Training lasted for 200,000 iterations with a batch size of 64 and a starting learning rate of  $1e-3$  which was decayed by a factor of  $1e-1$  at iterations 40,000, 80,000, 120,000 and 160,000. For more details on Nested Interactions see App. F.3.

**MNIST** MNIST consists of 70,000 28x28 greyscale images, each corresponding with one of the digits 0-9. There are 60,000 and 10,000 images in the pre-defined train and test sets respectively. We further split the train set into 50,000 images for training and 10,000 for validation. A 5-layer fully connected network with dimensions 500-300-250-250-250 was trained with stochastic gradient descent for 30 epochs, with a batch size of 128 and a starting learning rate of  $1e-2$  which was decayed by a factor of  $1e-1$  at iterations 4,000 and 8,000. Final accuracies of  $\approx 100\%$  (Train)  $\approx 100\%$  (Val) and  $\approx 98\%$  (Test) were achieved. All images are flattened. For  $\mathcal{P}_{MSE}$  all methods were evaluated on 200 test points. For adversarial attacks all methods were evaluated on 400 test points. The threshold for the quadratic optimization attack was set to  $T = 0.98$ .

**FMNIST.** FMNIST consists of 70,000 28x28 greyscale images, each corresponding with one of 10 articles of clothing. There are 60,000 and 10,000 images in the pre-defined train and test sets respectively. We further split the train set into 50,000 images for training and 10,000 for validation. Final accuracies of  $\approx 93\%$  (Train)  $\approx 93\%$  (Val) and  $\approx 88\%$  (Test) were achieved. The network and training details are identical to that used for MNIST above. All images are flattened. For  $\mathcal{P}_{MSE}$  all methods were evaluated on 200 test points. For adversarial attacks all methods were evaluated on 400 test points. The threshold for the quadratic optimization attack was set to  $T = 0.98$ .

**CIFAR10** CIFAR10 consists of 60,000 3x32x32 RGB color images, each corresponding with an animal or vehicle. There are 50,000 and 10,000 images in the pre-defined train and test sets respectively. We further split the train set into 40,000 images for training and 10,000 for validation. A ResNet-18 [32] was trained on CIFAR10 for 55 epochs using a batch size of 128. The first 5 epochs were used for warmup with a starting learning rate of  $1e-2$  ending at 0.5. For the rest of training a cosine decay schedule was used [52] decaying down to  $1e-5$  by the final epoch. Augmentations used for training were (i) Random Horizontal Flip ( $p = 0.5$ ) (ii) Color Jitter ( $p = 0.8$ ) with brightness, contrast and saturation values equal to 0.4 and hue value 0.1 (iii) Random Grayscale ( $p = 0.2$ ). Final accuracies of  $\approx 85\%$  (Train, Augmentations)  $\approx 96\%$  (Val, No Augmentations) and  $\approx 90\%$  (Test, No Augmentations) were achieved. No augmentations were applied to the validation/test data when evaluating explainers. For  $\mathcal{P}_{MSE}$  all methods were evaluated on 100 test points. For adversarial attacks all methods were evaluated on 200 test points. The threshold for the quadratic optimization attack was set to  $T = 0.8$ .

**Spirometry.** The Spirometry dataset uses raw exhalation curves, measured in volume over time, recorded during a spirometry exam. Each spirometry curve is measured in 10ms intervals, which we downsample to 50ms intervals and limit to 15s in total length, resulting in 300 features. We use the UK Biobank dataset, which is a large, population-based study conducted in the United Kingdom. Participant statistics have been previously reported in Sudlow et al. [79]. The UK Biobank records 2-3 exhalation efforts for each participant, using a Vitalograph Pneumotrac 6800 device\*. If two efforts are recorded as passing acceptability criteria and are also reproducible ( $\leq 5\%$  difference in Forced Vital Capacity (FVC) and Forced Expiratory Volume in 1 Second (FEV<sub>1</sub>)), then the third

\*<https://biobank.ctsu.ox.ac.uk/crystal/crystal/docs/Spirometry.pdf>

| Dataset    | MNIST                        |        |        |                              |        |        | FMNIST                       |        |        |                              |        |        | CIFAR10                      |        |        |                              |        |        |
|------------|------------------------------|--------|--------|------------------------------|--------|--------|------------------------------|--------|--------|------------------------------|--------|--------|------------------------------|--------|--------|------------------------------|--------|--------|
| Function   | Class Logit ( $\downarrow$ ) |        |        | Int. Neuron ( $\downarrow$ ) |        |        | Class Logit ( $\downarrow$ ) |        |        | Int. Neuron ( $\downarrow$ ) |        |        | Class Logit ( $\downarrow$ ) |        |        | Int. Neuron ( $\downarrow$ ) |        |        |
| $\epsilon$ | 0.25                         | 0.50   | 1.00   | 0.25                         | 0.50   | 1.00   | 0.25                         | 0.50   | 1.00   | 0.25                         | 0.50   | 1.00   | 0.25                         | 0.50   | 1.00   | 0.25                         | 0.50   | 1.00   |
| SH+SG (Us) | 4.5e-5                       | 1.8e-4 | 7.2e-4 | 1.1e-5                       | 4.6e-5 | 1.8e-4 | 1.1e-5                       | 4.6e-5 | 1.8e-4 |
| SG [76]    | 4.5e-5                       | 1.8e-4 | 7.2e-4 | 1.1e-5                       | 4.6e-5 | 1.8e-4 | 1.1e-5                       | 4.6e-5 | 1.8e-4 |
| SP H + G   | 400.0                        | 200.0  | 95.0   | 400.0                        | 200.0  | 100.0  | 350.0                        | 160.0  | 75.0   | 360.0                        | 190.0  | 95.0   | 11.5                         | 6.0    | 3.5    | 11.0                         | 6.0    | 4.0    |
| SP G       | 390.0                        | 200.0  | 100.0  | 400.0                        | 200.0  | 100.0  | 390.0                        | 180.0  | 95.0   | 360.0                        | 190.0  | 95.0   | 14.0                         | 8.0    | 4.0    | 16.0                         | 7.0    | 4.0    |
| SW (H + G) | 190.0                        | 95.0   | 55.0   | 190.0                        | 95.0   | 50.0   | 170.0                        | 80.0   | 45.0   | 170.0                        | 90.0   | 45.0   | 8.5                          | 8.5    | 8.5    | 11.0                         | 11.0   | 11.0   |
| SW G       | 190.0                        | 95.0   | 55.0   | 190.0                        | 95.0   | 50.0   | 180.0                        | 100.0  | 65.0   | 170.0                        | 90.0   | 50.0   | 8.5                          | 8.5    | 8.5    | 11.0                         | 11.0   | 11.0   |

Table 3: Selected values of  $\sigma^2$  and  $\beta$ , achieving the lowest average  $\mathcal{P}_{MSE}$  on a held-out validation set.

effort is omitted. A common metric used to evaluate lung health is the Forced Expiratory Volume in 1 Second ( $FEV_1$ ), which is the maximum volume of air that can be expelled by the participant in 1 second [59]. Note that a participant’s  $FEV_1$  measurement is taken as the maximum  $FEV_1$  over all recorded exhalation efforts during a single visit.

The spirometer automatically evaluates effort against a number of acceptability criteria. One such criteria is the detection of coughing. In our experiment, we use a subset of exhalation efforts where coughing was detected and train a CNN to predict the participant’s final  $FEV_1$  measurement. This subset contains 8,721 samples, which we split into training (80%) and test (20%) partitions. We follow the preprocessing in Hill et al. [36] to ensure that participants have at least one effort that passes quality control where  $FEV_1$  can be measured. The trained CNN includes 10 convolution blocks. Each block contains a 1-d convolution of kernel width 200 and 20 channels, batch normalization, dropout ( $p=0.5$ ), and skip connection. The model is trained using mean squared error (MSE), achieving 0.563 MSE on the train set and 0.547 MSE on the test set.

## E.2 Hyperparameters

For ease of reading, we use the following notation below:  $[a : b : c] = \{a, a + c, a + 2c, \dots, b - 2c, b - c\} \subseteq \mathbb{R}$  denotes the set of points between  $a$  (inclusive) and  $b$  (exclusive) at intervals of size  $c$ . Here  $a$  and  $b$  are chosen such that  $a < b$  and  $(b - a) \bmod c = 0$ . An example is:  $[0.1 : 1.0 : 0.1] = \{0.1, 0.2, 0.3, 0.4, 0.5, 0.6, 0.7, 0.8, 0.9\}$ .

### E.2.1 $\mathcal{P}_{MSE}$

For each of the 18 combinations of dataset, function and neighborhood size  $\epsilon$  the performance of  $\beta$  and  $\sigma$  are validated on a held out set before selection. 200 validation points are used to choose  $\sigma, \beta$  for MNIST and FMNIST and 50 validation points are used for CIFAR10. For SmoothHess + SmoothGrad and SmoothGrad *only three values of  $\sigma$*  are validated, based on the common sense criterion  $\sigma = \epsilon/\sqrt{d}$ : given neighborhood size  $\epsilon$  and dataset with dimension  $d$ ,  $\sigma$  is chosen from  $\sigma \in \{\epsilon/2\sqrt{d}, 3\epsilon/4\sqrt{d}, \epsilon/\sqrt{d}\}$ .

The following values of  $\beta$  are checked on a validation set:

**MNIST and FMNIST**  $\beta \in [0.1 : 1 : 0.1] \cup [1 : 20 : 1] \cup [20 : 95 : 5] \cup [100 : 800 : 10]$

**CIFAR10:**  $\beta \in [0.1 : 1 : 0.1] \cup [1 : 20 : 0.5] \cup [20 : 95 : 5] \cup [100 : 800 : 10]$

The values of  $\sigma$  for SH and SH + SG, and  $\beta$  for SP H + G and SP G which achieve the lowest  $\mathcal{P}_{MSE}$  on the validation data are shown in Table 3. The results for SoftPlus  $\beta$  are interesting: (i) We see that MNIST and FMNIST results, for both class logit and interior neuron, are consistent for fixed  $\epsilon$ . Further we see that CIFAR10 results between class logit and interior neuron are consistent for fixed  $\epsilon$ . (ii) The optimal value of  $\beta$  seems to be approximately proportional to the value of  $\epsilon$ . While our results in Table 1 show that SmoothHess is better at capturing local interactions than the SoftPlus Hessian, the results in Table 3 indicate that the relationship between  $f$ ,  $f_\beta$  and  $\beta$  warrants further exploration.

### E.2.2 Adversarial Attacks

200 validation points were used to choose  $\beta$  and  $\sigma^2$  for MNIST and FMNIST and 50 validation points were used to choose  $\beta$  and  $\sigma^2$  for CIFAR10.

| Dataset                     | MNIST |      |      |      |        | FMNIST |      |      |        |      | CIFAR10 |      |      |        |        |
|-----------------------------|-------|------|------|------|--------|--------|------|------|--------|------|---------|------|------|--------|--------|
| Attack Magnitude $\epsilon$ | 0.25  | 0.50 | 0.75 | 1.25 | 1.75   | 0.25   | 0.50 | 0.75 | 1.25   | 1.75 | 0.1     | 0.2  | 0.3  | 0.4    | 1.0    |
| SH+SG (Us)                  | 1e-3  | 5e-3 | 3e-2 | 5e-2 | 1.5e-1 | 1e-3   | 4e-2 | 3e-2 | 8e-2   | 3e-2 | 5e-5    | 1e-4 | 4e-4 | 4e-4   | 7.5e-4 |
| SG [76]                     | 1e-3  | 5e-3 | 2e-2 | 6e-2 | 8e-2   | 5e-3   | 4e-2 | 8e-2 | 1.5e-1 | 3e-1 | 5e-5    | 3e-4 | 5e-4 | 7.5e-4 | 3e-3   |
| SP H + G                    | 8     | 18   | 17   | 10   | 6      | 20     | 25   | 13   | 9      | 6    | 5       | 4    | 3    | 2      | 2      |
| SP G                        | 10    | 12   | 10   | 11   | 3      | 30     | 9    | 11   | 8      | 3    | 5       | 4    | 3    | 2      | 2      |

Table 4: Selected values of  $\sigma^2$  and  $\beta$ , achieving the lowest post-hoc accuracy of adversarial attacks on a held-out validation set.

The following values of  $\sigma^2$  were validated for adversarial attacks:

**MNIST and FMNIST:**  $\sigma^2 \in \{0.001, 0.005\} \cup [0.01 : 0.1 : 0.01] \cup [0.15 : 1.00 : 0.05]$

**CIFAR10:**  $\sigma^2 \in \{5e-05, 7.5e-05\} \cup [0.0001 : 0.0006 : 0.0001] \cup \{0.00075\} \cup [0.001 : 0.006 : 0.001]$

The following values of  $\beta$  were validated for adversarial attacks:

**MNIST and FMNIST:**  $\beta \in [1 : 20 : 1] \cup [20 : 100 : 5] \cup [100 : 210 : 10]$ .

**CIFAR10:**  $\beta \in [1 : 10 : 1] \cup [10 : 45 : 5]$

The values of  $\sigma^2$  and  $\beta$  that achieve lowest validation post-hoc accuracy are shown in Table 4. Following intuition, it is generally the case that parameters corresponding with increased smoothing (larger  $\sigma^2$  and smaller  $\beta$ ) achieve better results (lower post-hoc accuracy) for large  $\epsilon$ , and parameters corresponding to less smoothing (smaller  $\sigma^2$  and larger  $\beta$ ) achieve better results for small  $\epsilon$ .

## F Additional Experiments

### F.1 $\mathcal{P}_{MSE}$

**Comparison with Swish:** In Table 1,  $\mathcal{P}_{MSE}$  results are presented for five methods: the first (SmoothGrad) and second (SmoothHess + SmoothGrad) order Taylor expansions of the ReLU network  $f$  convolved with a Gaussian, the first and second order Taylor expansions of the SoftPlus smoothed network and the vanilla (unsmoothed) Gradient. We present Table 5, a version of Table 1 which includes additional results comparing with Swish [65] smoothed networks. Swish, an alternative smooth activation to SoftPlus, is formally defined as  $\text{Sw}_\beta(x) = x \text{sigmoid}(\beta x)$  where  $\text{sigmoid}(x) = \frac{1}{1+\exp(-x)}$  and  $\beta$  is a hyperparameter determining the level of smoothing. It can be seen in Table 5 that Swish is generally less effective than SoftPlus, and is outperformed by our method at each combination of dataset and locality.

**Standard Deviation:** We report the standard deviation of the  $\mathcal{P}_{MSE}$  for each method, dataset, function and neighborhood size  $\epsilon$  in Table 6. Of the 18  $\mathcal{P}_{MSE}$  results, SmoothHess + SmoothGrad attains the lowest standard deviation for 15 and ties with SoftPlus Hessian + SoftPlus Gradient for 2. The standard deviation of SoftPlus Hessian + SoftPlus Gradient is the lowest for FMNIST internal neuron at  $\epsilon = 0.5$ , achieving  $2.4e-7$  while SmoothHess + SmoothGrad achieves  $2.5e-7$ .

**ResNet101:** We repeat our  $\mathcal{P}_{MSE}$  experiment for the predicted class logits of CIFAR10 using a ResNet101, reporting results in Table 7. It can be seen in the leftmost column that our method, SH + SG, achieves superior performance to the competing methods at each locality, indicating that SmoothHess can generalize to larger network architectures. The standard deviation of  $\mathcal{P}_{MSE}$ , as well as choices of  $\sigma^2 / \beta$  (as selected from a validation set) are reported in the center and rightmost columns, respectively.

### F.2 Adversarial Attacks

**Comparison with Vanilla Hessian:** One may use the vanilla Hessian of the predicted SoftMax probability, which admits higher order derivatives, to construct adversarial attacks. Table 8 is an updated version of Table 2 which includes results for attacks using the vanilla Hessian + vanilla Gradient (H + G), in the third to last row.

We see that inclusion of the vanilla Hessian generally results in more effective attacks than use of the vanilla gradient alone. H + G ties SH+SG and SP H + G for lowest post-hoc accuracy at the

| Dataset    | MNIST                        |               |                              | FMNIST                       |               |                              | CIFAR10                      |               |                              |
|------------|------------------------------|---------------|------------------------------|------------------------------|---------------|------------------------------|------------------------------|---------------|------------------------------|
| Function   | Class Logit ( $\downarrow$ ) |               | Int. Neuron ( $\downarrow$ ) | Class Logit ( $\downarrow$ ) |               | Int. Neuron ( $\downarrow$ ) | Class Logit ( $\downarrow$ ) |               | Int. Neuron ( $\downarrow$ ) |
| $\epsilon$ | 0.25                         | 0.50          | 1.00                         | 0.25                         | 0.50          | 1.00                         | 0.25                         | 0.50          | 1.00                         |
| SH+SG (Us) | <b>9.6e-7</b>                | <b>7.8e-6</b> | <b>6.7e-5</b>                | <b>4.9e-8</b>                | <b>4.0e-7</b> | <b>3.3e-6</b>                | <b>6.5e-7</b>                | <b>4.0e-6</b> | <b>4.3e-5</b>                |
| SG [76]    | 4.5e-6                       | 4.1e-5        | 3.9e-4                       | 2.1e-7                       | 1.7e-6        | 1.5e-5                       | 3.0e-6                       | 2.7e-5        | 2.6e-4                       |
| SP (H + G) | 1.2e-6                       | 9.6e-6        | 8.1e-5                       | 5.5e-8                       | 4.4e-7        | 3.7e-6                       | 9.6e-7                       | 7.5e-6        | 6.5e-5                       |
| SP G       | 4.6e-6                       | 4.1e-5        | 3.9e-4                       | 2.1e-7                       | 1.7e-6        | 1.5e-5                       | 3.2e-6                       | 2.8e-5        | 2.6e-4                       |
| SW (H+G)   | 2.4e-6                       | 2.0e-5        | 1.9e-4                       | 1.0e-7                       | 8.3e-7        | 7.3e-6                       | 2.1e-6                       | 1.7e-5        | 1.8e-4                       |
| SW G       | 5.6e-6                       | 5.0e-5        | 4.9e-4                       | 2.4e-7                       | 2.0e-6        | 1.8e-5                       | 3.9e-6                       | 3.5e-5        | 3.5e-4                       |
| G [73]     | 4.2e-3                       | 1.7e-2        | 6.7e-2                       | 2.0e-3                       | 7.0e-3        | 2.9e-2                       | 3.8e-3                       | 1.5e-2        | 6.0e-2                       |

Table 5: Average  $\mathcal{P}_{MSE}$  results at three radii  $\epsilon$ , with the inclusion of vanilla Gradient (G). Other methods include: SmoothHess + SmoothGrad (SH+SG,Us) SmoothGrad (SG) SoftPlus Grad (SP G) SoftPlus Hessian + Gradient (SP H + G). Results are provided for the predicted class logit, and the penultimate neuron maximally activated by the "three," dress and cat classes for MNIST, FMNIST and CIFAR10 respectively.

| Dataset    | MNIST                        |               |                              | FMNIST                       |               |                              | CIFAR10                      |               |                              |
|------------|------------------------------|---------------|------------------------------|------------------------------|---------------|------------------------------|------------------------------|---------------|------------------------------|
| Function   | Class Logit ( $\downarrow$ ) |               | Int. Neuron ( $\downarrow$ ) | Class Logit ( $\downarrow$ ) |               | Int. Neuron ( $\downarrow$ ) | Class Logit ( $\downarrow$ ) |               | Int. Neuron ( $\downarrow$ ) |
| $\epsilon$ | 0.25                         | 0.50          | 1.00                         | 0.25                         | 0.50          | 1.00                         | 0.25                         | 0.50          | 1.00                         |
| SH+SG (Us) | <b>9.9e-7</b>                | <b>7.3e-6</b> | <b>6.4e-5</b>                | <b>3.9e-8</b>                | <b>2.7e-7</b> | <b>2.1e-6</b>                | <b>1.0e-6</b>                | <b>7.7e-6</b> | <b>6.4e-5</b>                |
| SG [76]    | 7.0e-6                       | 7.4e-5        | 7.1e-5                       | 2.2e-7                       | 1.6e-6        | 1.2e-5                       | 5.5e-6                       | 5.1e-5        | 4.6e-4                       |
| SP (H + G) | 1.2e-6                       | 9.5e-6        | 7.7e-5                       | 4.4e-8                       | 2.9e-7        | <b>2.1e-6</b>                | 2.4e-6                       | 1.5e-5        | 1.2e-4                       |
| SP G       | 7.1e-6                       | 7.4e-5        | 7.2e-4                       | 2.2e-7                       | 1.6e-6        | 1.2e-5                       | 6.1e-6                       | 5.4e-5        | 4.7e-4                       |
| SW (H+G)   | 2.6e-6                       | 2.0e-5        | 1.9e-4                       | 6.5e-8                       | 4.6e-7        | 4.2e-6                       | 7.2e-6                       | 3.3e-5        | 3.7e-4                       |
| SW G       | 7.3e-6                       | 7.2e-5        | 7.4e-4                       | 2.1e-7                       | 1.5e-6        | 1.2e-5                       | 6.6e-6                       | 6.2e-5        | 6.2e-4                       |
| G [73]     | 2.1e-3                       | 8.4e-3        | 3.4e-2                       | 7.9e-5                       | 3.0e-4        | 1.2e-3                       | 2.7e-3                       | 1.1e-2        | 4.3e-2                       |

Table 6: Standard deviation of  $\mathcal{P}_{MSE}$  at three radii  $\epsilon$ . SmoothHess + SmoothGrad (SH+SG,Us) SmoothGrad (SG) SoftPlus Grad (SP G) SoftPlus Hessian + Gradient (SP H + G) Vanilla gradient (G). Results are provided for the predicted class logit, and the penultimate neuron maximally activated by the "three," dress and cat classes for MNIST, FMNIST and CIFAR10 respectively.

smallest magnitude ( $\epsilon = 0.25$ ) for the simplest dataset (MNIST). However, as no smoothing is done, the attacks generated from the H + G are generally significantly weaker than those generated using smooth surrogates. In fact, aside from MNIST with  $\epsilon = 0.25$ , the second order vanilla H + G attacks achieve higher post-hoc accuracy than first-order method SmoothGrad for all datasets and values of  $\epsilon$ . This is especially apparent for CIFAR10, the most complex dataset.

### F.3 Nested Interactions

We use the Nested Interactions dataset to highlight SmoothHess's ability to capture different interactions occurring at *various localities* around a given point. In this experiment we measure interactions around the origin  $x_0 = (0, 0)^T \in \mathbb{R}^2$ .

Just like the Four Quadrant dataset, the Nested Interactions dataset consists of points  $x \in \mathbb{R}^2$  sampled uniformly from  $[-2, 2] \times [-2, 2] \subset \mathbb{R}^2$  with a spacing of 0.008. We establish different interactions occurring around the origin  $x_0$ , based upon the distance from  $x_0$ . Specifically, we set the label for a given point  $x$  by:  $x \in B_{0.6}(x_0) \implies y(x) = \frac{1}{2}x_1^2 + x_1x_2$ ,  $x \in B_{1.2}(x_0) \setminus B_{0.6}(x_0) \implies y(x) = x_1x_2$ ,  $x \in \mathbb{R}^2 \setminus B_{1.2}(x_0) \implies y(x) = -5x_1x_2$ .

In words, the interaction between features  $x_1$  and  $x_2$  is 1 inside the radius-1.2 ball around  $x_0$  and is  $-5$  outside of this ball. The interaction between  $x_1$  and itself is 1 inside the radius-0.6 ball around  $x_0$  and 0 outside of this ball. The interaction between  $x_2$  and itself is 0 over all of  $\mathbb{R}^2$ .

We train a 6-layer neural network on the Nested Interactions dataset and estimate SmoothHess and SoftPlus Hessian for  $\log_{10} \sigma^2 \in \{1e-6, \dots, 1e1\}$  and  $\log_{10} \beta \in \{-1, \dots, 4.0\}$  respectively. The interaction results for  $x_1$  with itself,  $x_1$  with  $x_2$  and  $x_2$  with itself as a function of the level of smoothing ( $\sigma$  or  $\beta$ ) are reported in Figure 5.

As the target function  $y(x)$  is discontinuous, it is not possible for a network to memorize the Nested Interactions dataset. Thus, there very well may be interactions occurring in the network which are not described as above; the interactions we know occur in the data are not a pure "gold-standard". That being said, Figure 5 shows that SmoothHess captures the interactions as we know occur in the data, and the SoftPlus Hessian does not. This suggests that, to a large extent, both (i) the network has



| Value         | $\mathcal{P}_{MSE}$ |               |               | $\mathcal{P}_{MSE}$ Std |               |               | $\sigma^2, \beta$ used |        |        |
|---------------|---------------------|---------------|---------------|-------------------------|---------------|---------------|------------------------|--------|--------|
| $\epsilon$    | 0.25                | 0.50          | 1.00          | 0.25                    | 0.50          | 1.00          | 0.25                   | 0.50   | 1.00   |
| SH+SG (Us)    | <b>1.3e-4</b>       | <b>9.5e-4</b> | <b>6.9e-3</b> | <b>1.7e-4</b>           | <b>1.1e-3</b> | <b>1.1e-2</b> | 1.1e-5                 | 4.6e-6 | 1.8e-4 |
| SG            | 5.3e-4              | 4.3e-3        | 3.3e-2        | 1.0e-3                  | 8.3e-3        | 6.7e-2        | 1.1e-5                 | 4.6e-6 | 1.8e-4 |
| SP (H + G)    | 3.7e-4              | 2.6e-3        | 1.7e-2        | 6.6e-4                  | 2.7e-3        | 3.1e-2        | 41.0                   | 16.0   | 11.5   |
| SP G          | 6.2e-4              | 5.0e-3        | 3.7e-2        | 1.1e-3                  | 8.8e-3        | 6.9e-2        | 55.0                   | 22.5   | 11.5   |
| Swish (H + G) | 1.5e-3              | 1.2e-2        | 4.5e-2        | 2.5e-3                  | 8.3e-3        | 2.8e-2        | 27.5                   | 17.5   | 1.5    |
| Swish G       | 8.8e-4              | 7.0e-3        | 5.3e-2        | 1.4e-3                  | 1.1e-2        | 8.3e-2        | 60.0                   | 1.0e6  | 1.0e6  |
| G             | 3.8e0               | 1.5e+1        | 6.0e+1        | 3.3e0                   | 1.3e1         | 5.2e1         | n/a                    | n/a    | n/a    |

Table 7: Using a ResNet101 trained on CIFAR10, the average  $\mathcal{P}_{MSE}$  achieved by SmoothHess + SmoothGrad (SH + SG, Us), SmoothGrad (SG), SoftPlus Hessian + SoftPlus Gradient (SP (H+G)), SoftPlus Gradient (SP G), Swish Hessian + Swish Gradient (Swish (H+G)), Swish Gradient (Swish G) and Vanilla Gradient (G), is evaluated as a proxy for explainer quality. Results are reported at three radii  $\epsilon$ , for the predicted class logit. **Left:**  $\mathcal{P}_{MSE}$  results are reported. The lowest value in each column is bolded. **Middle:** The standard deviation of  $\mathcal{P}_{MSE}$  is reported. The lowest value in each column is bolded. **Right:** The smoothing hyperparameter ( $\sigma^2$  for SmoothGrad and SmoothHess + SmoothGrad,  $\beta$  for SoftPlus and Swish) used is reported. *Our method, SH + SG, achieves the lowest  $\mathcal{P}_{MSE}$  for each of the three radii  $\epsilon$ . This indicates that the interactions SmoothHess captures improve the model of network behaviour, even for large networks such as ResNet101.*

| Dataset                     | MNIST       |             |             |             |            | FMNIST      |             |             |            |            | CIFAR10     |             |             |             |            |
|-----------------------------|-------------|-------------|-------------|-------------|------------|-------------|-------------|-------------|------------|------------|-------------|-------------|-------------|-------------|------------|
| Attack Magnitude $\epsilon$ | 0.25        | 0.50        | 0.75        | 1.25        | 1.75       | 0.25        | 0.50        | 0.75        | 1.25       | 1.75       | 0.1         | 0.2         | 0.3         | 0.4         | 1.0        |
| SH+SG (Us)                  | <b>93.0</b> | <b>80.3</b> | <b>48.0</b> | <b>10.5</b> | <b>2.0</b> | <b>79.5</b> | <b>46.8</b> | <b>25.0</b> | <b>3.5</b> | <b>0.0</b> | <b>62.5</b> | <b>38.5</b> | <b>26.5</b> | <b>15.0</b> | 4.5        |
| SG [76]                     | 93.3        | 81.8        | 48.8        | 11.3        | 2.8        | <b>79.5</b> | 49.3        | 26.3        | 4.0        | <b>0.0</b> | 65.0        | 42.0        | 27.5        | 17.0        | <b>0.0</b> |
| SP (H + G)                  | <b>93.0</b> | 81.8        | 51.5        | 15.8        | 7.5        | 79.8        | 51.0        | 27.5        | 5.3        | 0.8        | 64.5        | 42.0        | 31.0        | 23.5        | 7.5        |
| SP G                        | 93.3        | 82.3        | 53.8        | 16.3        | 5.0        | 79.8        | 51.5        | 29.5        | 7.8        | 1.0        | 66.5        | 47.5        | 36.0        | 29.5        | 8.5        |
| H + G                       | <b>93.0</b> | 81.8        | 55.3        | 19.0        | 11.8       | 80.0        | 50.0        | 30.3        | 9.5        | 2.0        | 68.0        | 51.5        | 40.5        | 32.5        | 22.0       |
| G [73]                      | 93.3        | 82.8        | 56.0        | 18.5        | 8.8        | 80.3        | 52.3        | 31.8        | 11.0       | 2.5        | 69.0        | 51.5        | 41.0        | 34.0        | 21.5       |
| Random                      | 99.8        | 99.5        | 99.0        | 99.0        | 98.8       | 99.3        | 98.0        | 97.3        | 95.5       | 93.8       | 100.0       | 99.5        | 99.0        | 98.5        | 96.5       |

Table 8: Post-hoc accuracy of adversarial attacks performed on the predicted SoftMax probability, at five attack magnitudes  $\epsilon$ , with the inclusion of the vanilla Hessian + vanilla Gradient (H + G). Lower is better. Other methods include: SmoothHess + SmoothGrad (SH + SG, Ours), SmoothGrad (SG), SoftPlus Gradient (SP G), SoftPlus Hessian + SoftPlus Gradient (SP (H + G)) and vanilla Gradient (G). First order attack vectors are constructed by scaling the normalized gradient by  $\epsilon$  and subtracting from the input. Second order attack vectors are found by minimizing the corresponding second-order Taylor expansions.

memorized the data and (ii) SmoothHess captures the network behaviour while the SoftPlus Hessian does not.

#### F.4 Qualitative Comparison

We present a visual comparison of the interactions found by SmoothHess with those from other methods. Namely, we consider methods that can be interpreted as the quadratic term in a second-order Taylor expansion around a smooth surrogate network: SoftPlus Hessian and Swish Hessian.

We show interactions found between super-pixels of CIFAR10 test images. To this end, we utilize the Simple Linear Iterative Clustering (SLIC) [2] algorithm to segment the image into 20-25 super-pixels. We sum interactions between each pair of features in each pair of super-pixels, before visualization.

Results are shown in Figure 6 for the predicted class logit of a ResNet18 model for three CIFAR10 test images. Here, each row corresponds to a separate image. Test images are visualized in column 1. Columns 2-4 correspond to the three methods. For each image, interactions between one chosen

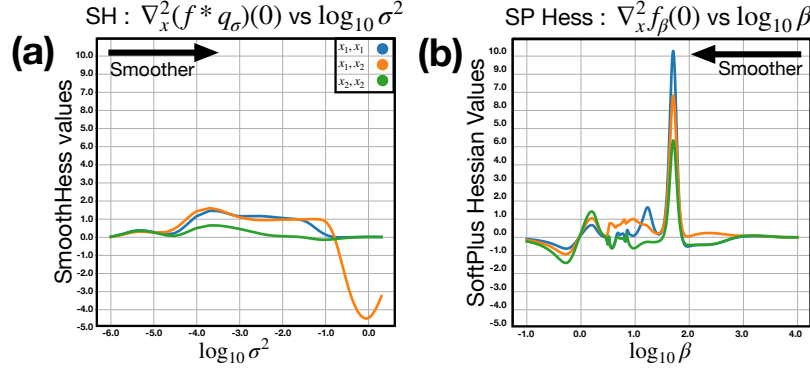

Figure 5: Three estimated Hessian elements at  $x_0 = (0, 0)^T$  for a 6-layer ReLU Network  $f : \mathbb{R}^2 \rightarrow \mathbb{R}$  trained on the Nested Interactions dataset. **(a)** SmoothHess (SH) is estimated with isotropic covariance  $\Sigma = \sigma^2 I$  using granularly sampled  $\sigma^2 \in \{1e-6, \dots, 10\}$ . At minute  $\sigma^2 < 1e-4$  either hyper-local noisy behavior is captured, or smoothing is so negligible that the smoothed function is approximately piece-wise linear with a low-magnitude Hessian. For  $\sigma$  ranging from  $\log_{10} \sigma^2 = 1e-4$  to  $\log_{10} \sigma^2 = 0$  we see SmoothHess reflects the interactions in the dataset: Starting at  $\log_{10} \sigma^2 = 1e-4$  both  $x_1 x_1$  and  $x_1 x_2$  have an interaction  $\approx 1$  until the interaction between  $x_1 x_1$  begins to dip to 0 around  $\log_{10} \sigma^2 = -1.5$ . Finally around  $1e-1$  the interaction  $x_1 x_2$  begins to dip toward  $-5$ , until  $\log_{10} \sigma^2 = 0$  when  $\sigma^2$  is so large that samples outside the training data distribution are incorporated into SmoothHess estimation. **(b)** The Hessian of the SoftPlus smoothed function  $f_\beta$  (SP Hess) is computed using granularly sampled  $\beta \in \{1e-1, \dots, 1e4\}$ . Here, as  $\beta$  is decreased, it is not apparent that the variety of interactions in the Nested Interactions dataset are captured, either in relative ordering or magnitude.

super-pixel (outlined in black) and each other super-pixel are visualized as a heatmap overlaid upon the image. In order to facilitate comparison across images and methods, we standardize the heatmap colorbar to range between the most negative and most positive interaction values on a per-image and method basis.

One interesting trend seen in each case is that there is a strong positive interaction between the chosen super-pixel and one other super-pixel which (a) is spatially nearby and (b) contains the class object of interest. For example, in the first row, the side-view mirror of the car positively interacts with the front wheel. In the second row, the tip of the frogs head can be seen to interact positively with the side of the head. In the third row, the upper and lower portions of the dogs front leg have a strong positive interaction.

Due to the subjectivity of this comparison, we include quantitative results above each image. Specifically, we indicate the  $\mathcal{P}_{MSE}$  each method achieves within an  $\varepsilon = 0.25$  ball around each image. Optimal smoothing parameters were chosen for each method for this task (see Table 3). It can be seen that SmoothHess achieves the lowest  $\mathcal{P}_{MSE}$  in each case by a wide margin. Thus, SmoothHess may be the preferable option if one wishes for a visualization which best reflects the network’s behaviour in an  $\varepsilon = 0.25$  ball around the image.



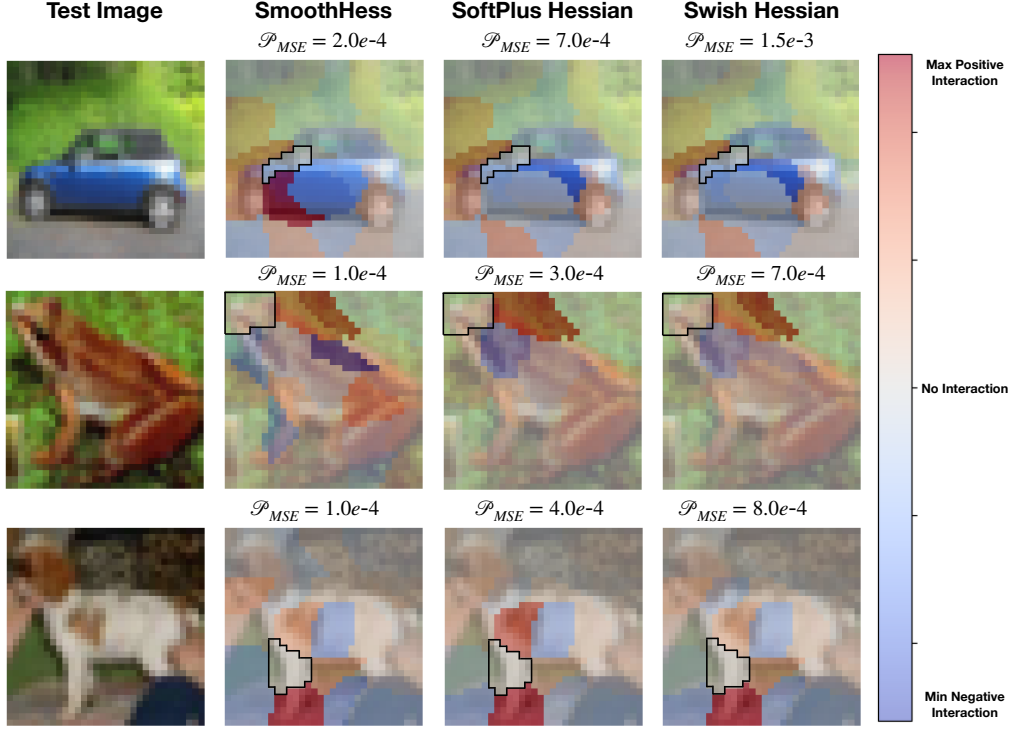

Figure 6: Visualization of interactions between super-pixels found for a ResNet18 on CIFAR10 by SmoothHess, SoftPlus Hessian and Swish Hessian. Results are shown for test images of a car, frog and dog in the first second and third rows respectively. Each image is visualised in column one. Images are segmented into 20-25 super-pixels using the SLIC algorithm [2]. Interactions are summed between each pair of features in each pair of super-pixels. We show interactions with one given super-pixel in each image, outlined in black. SmoothHess, SoftPlus Hessian and Swish Hessian interactions for this super-pixel are visualized as heatmaps overlaid upon the image in columns two, three and four, respectively. The heatmap colorbar is standardized to range between the minimum and maximum interactions on each image-method pair separately, to facilitate comparison. Quantitative  $\mathcal{P}_{MSE}$  results for  $\epsilon = 0.25$  are shown above each method-image pairing, with SmoothHess achieving the lowest  $\mathcal{P}_{MSE}$  in all cases.
